# Supplementary material for: Stabilized cubic phase BiAgSe2−xSx with excellent thermoelectric properties via phase boundary engineering
Source: Royal Society of Chemistry journal article supplement (doi:10.1039/d1tc00760b), 2021-01-01
Supplement: d1tc00760b1.pdf [file d1tc00760b1.pdf]

## Supplementary materials

### **Stabilized cubic phase BiAgSe<sub>2-x</sub>S<sub>x</sub> with excellent thermoelectric properties *via* phase boundary engineering**

Yao Hu<sup>a</sup>, Song Yuan<sup>a</sup>, Haojie Huo<sup>a</sup>, Juanjuan Xing<sup>a,b</sup>, Kai Guo<sup>a\*</sup>, Xinxin Yang<sup>a\*</sup>

Jun Luo<sup>a,b</sup>, Guang-Hui Rao<sup>c,d</sup>, Jing-Tai Zhao<sup>c,d</sup>

<sup>a</sup> School of Materials Science and Engineering, Shanghai University, 99 Shangda Road, Shanghai 200444, China.

<sup>b</sup> Materials Genome Institute, Shanghai University, 99 Shangda Road, Shanghai 200444, China

<sup>c</sup> School of Materials Science and Engineering, Guilin University of Electronic Technology, Guilin 541004, China

<sup>d</sup> Guangxi Key Laboratory of Information Materials, Guilin University of Electronic Technology, Guilin 541004, China

\* Corresponding author. [kai.guo@shu.edu.cn](mailto:kai.guo@shu.edu.cn) (K. Guo); [yangxinxin@t.shu.edu.cn](mailto:yangxinxin@t.shu.edu.cn) (X. Yang)

**Table S1** Densities of BiAgSe<sub>2-x</sub>S<sub>x</sub> ( $x = 0.8 - 1.2$ ).

| Composition                            | Theoretical Density<br>(g/cm <sup>3</sup> ) | Measured Density<br>(g/cm <sup>3</sup> ) | Relative Density<br>(%) |
|----------------------------------------|---------------------------------------------|------------------------------------------|-------------------------|
| BiAgSe <sub>1.2</sub> S <sub>0.8</sub> | 7.79                                        | 7.23                                     | 92.81                   |
| BiAgSe <sub>1.1</sub> S <sub>0.9</sub> | 7.67                                        | 7.45                                     | 97.13                   |
| BiAgSeS                                | 7.52                                        | 7.47                                     | 99.34                   |
| BiAgSe <sub>0.9</sub> S <sub>1.1</sub> | 7.42                                        | 7.39                                     | 99.60                   |
| BiAgSe <sub>0.8</sub> S <sub>1.2</sub> | 7.29                                        | 7.14                                     | 97.94                   |

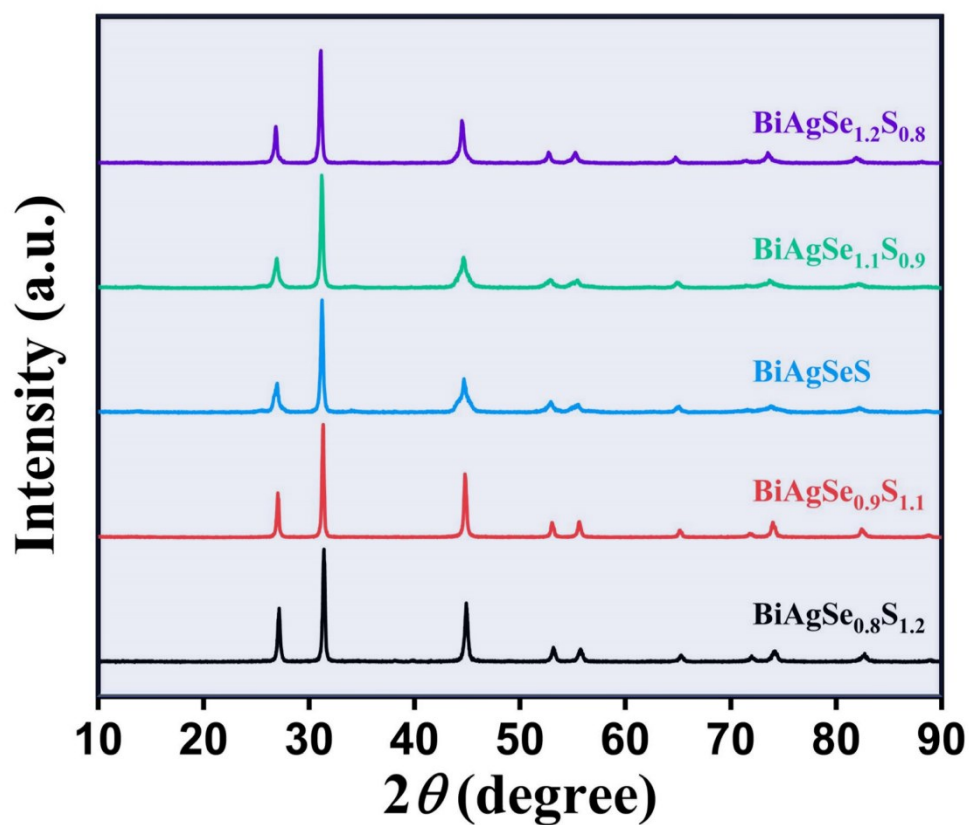

**Fig. S1** Powder XRD patterns for BiAgSe<sub>2-x</sub>S<sub>x</sub> ( $x = 0.8 - 1.2$ ) before heating-cooling cycle (HCC).  
All the samples crystalline in cubic structure.

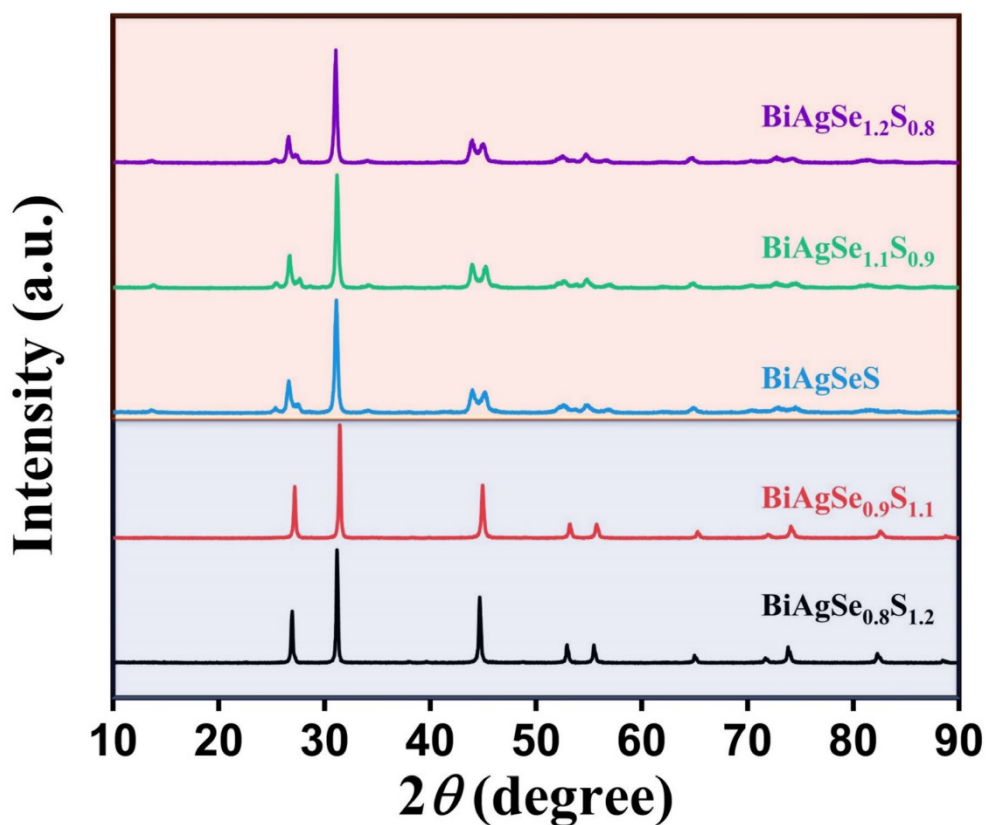

Fig. S2 Powder XRD patterns for  $\text{BiAgSe}_{2-x}\text{S}_x$  ( $x = 0.8 - 1.2$ ) after one heating-cooling cycle (HCC). Only  $\text{BiAgSe}_{0.9}\text{S}_{1.1}$  and  $\text{BiAgSe}_{0.8}\text{S}_{1.2}$  were still cubic phase.

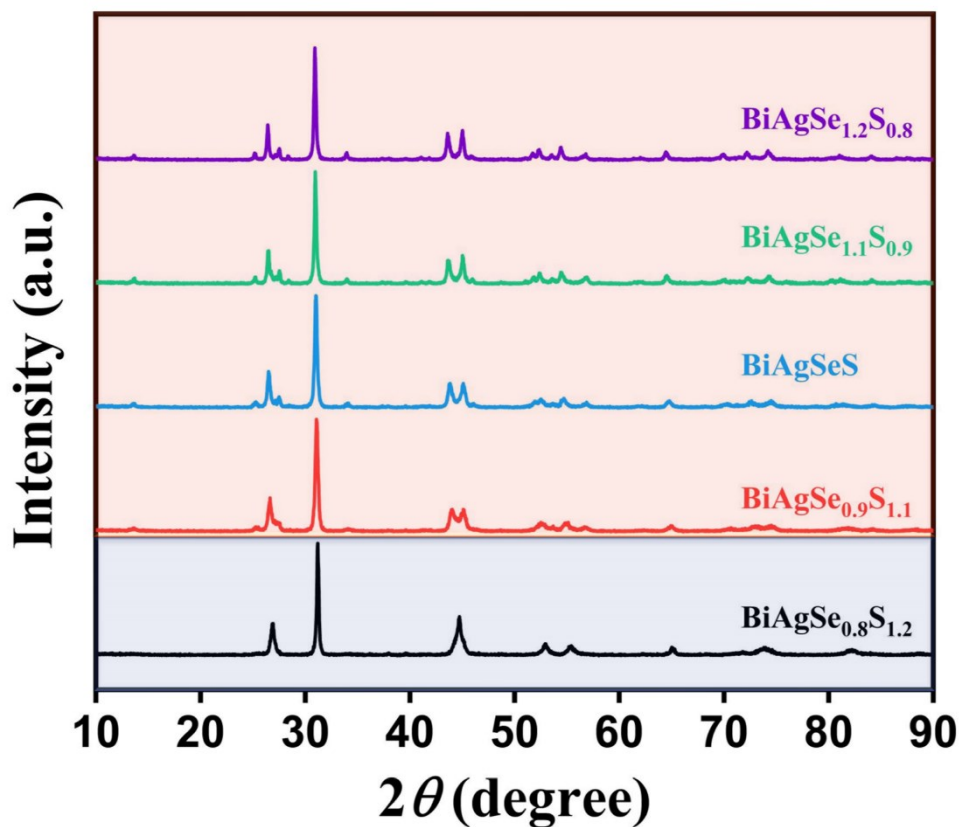

Fig. S3 Powder XRD patterns for  $\text{BiAgSe}_{2-x}\text{S}_x$  ( $x = 0.8 - 1.2$ ) after two heating-cooling cycle (HCC). Only  $\text{BiAgSe}_{0.8}\text{S}_{1.2}$  was still cubic phase.

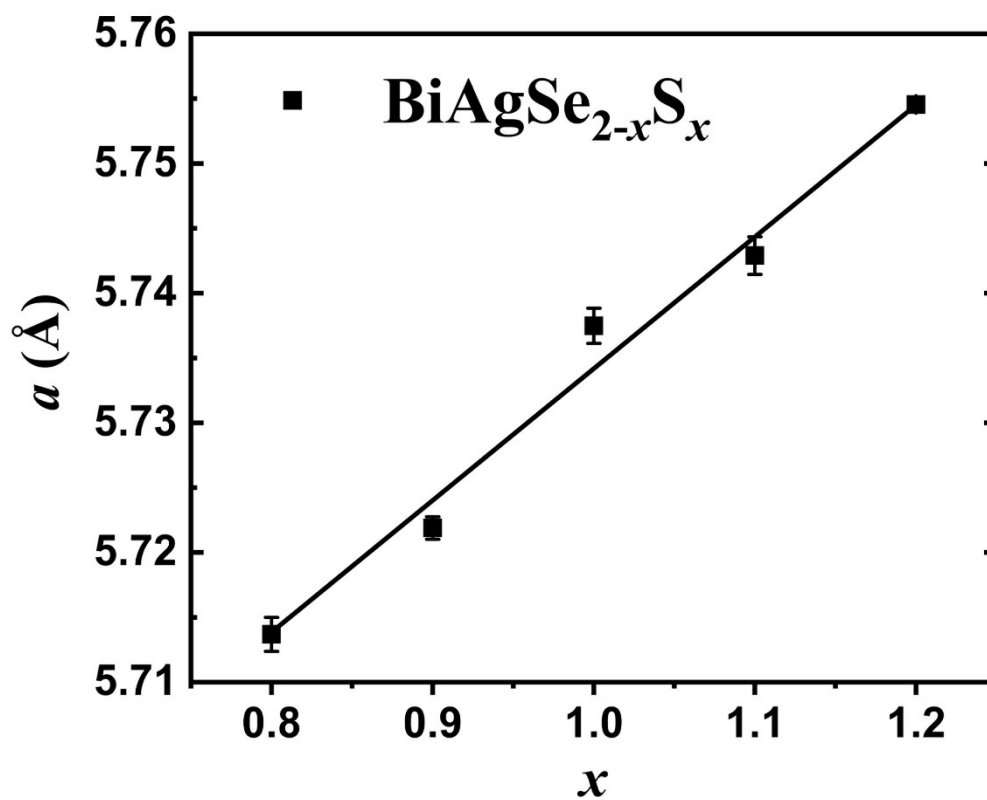

**Fig. S4** Lattice parameters of  $\text{BiAgSe}_{2-x}\text{S}_x$  ( $x = 0.8 - 1.2$ ) before heating-cooling cycle, which fit the Vegard's law well.

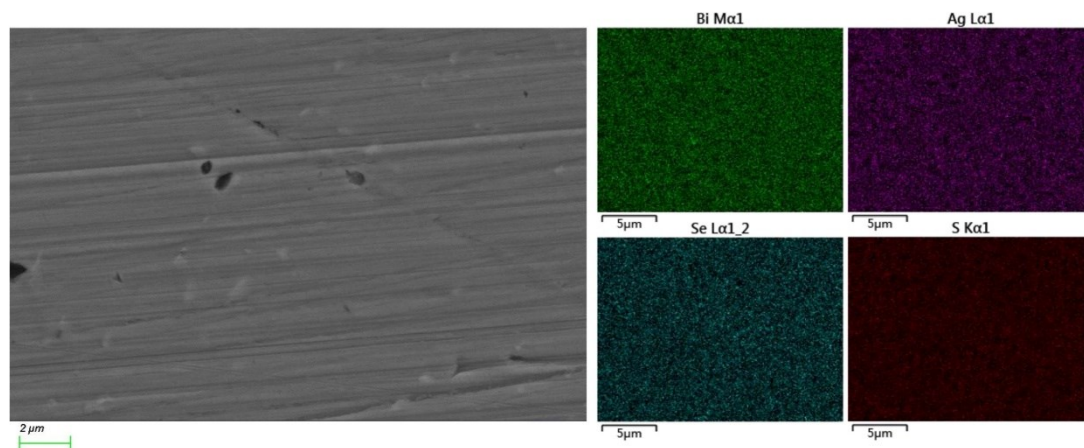

| Element | Atomic% | Normalization |
|---------|---------|---------------|
| S       | 27.98   | 1.02          |
| Se      | 19.57   | 0.71          |
| Ag      | 27.55   | 1.00          |
| Bi      | 24.90   | 0.90          |
| Total   | 100.00  | /             |

**Fig. S5** EDS analysis of  $\text{BiAgSe}_{0.8}\text{S}_{1.2}$ .

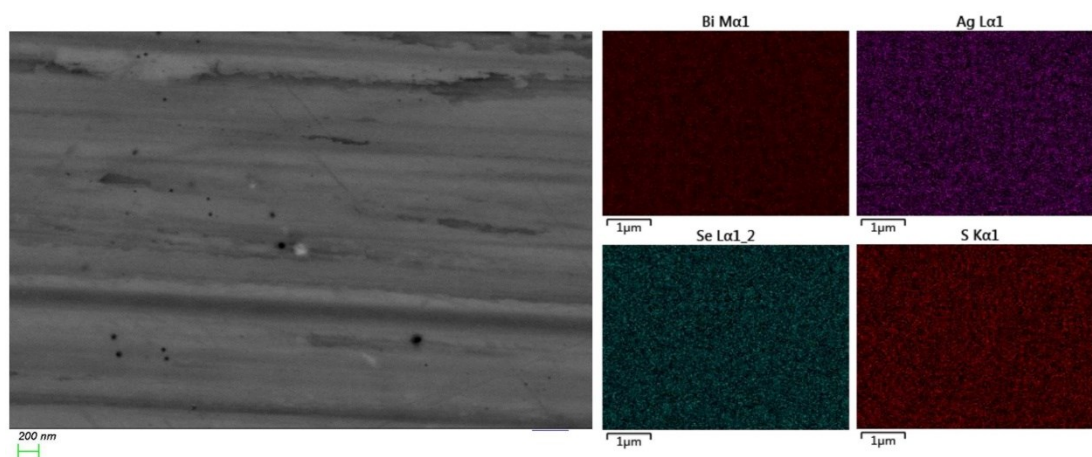

| Element | Atomic% | Normalization |
|---------|---------|---------------|
| S       | 23.71   | 0.90          |
| Se      | 24.55   | 0.93          |
| Ag      | 26.49   | 1.00          |
| Bi      | 25.25   | 0.95          |
| Total   | 100.00  | /             |

**Fig. S6** EDS analysis of BiAgSeS.

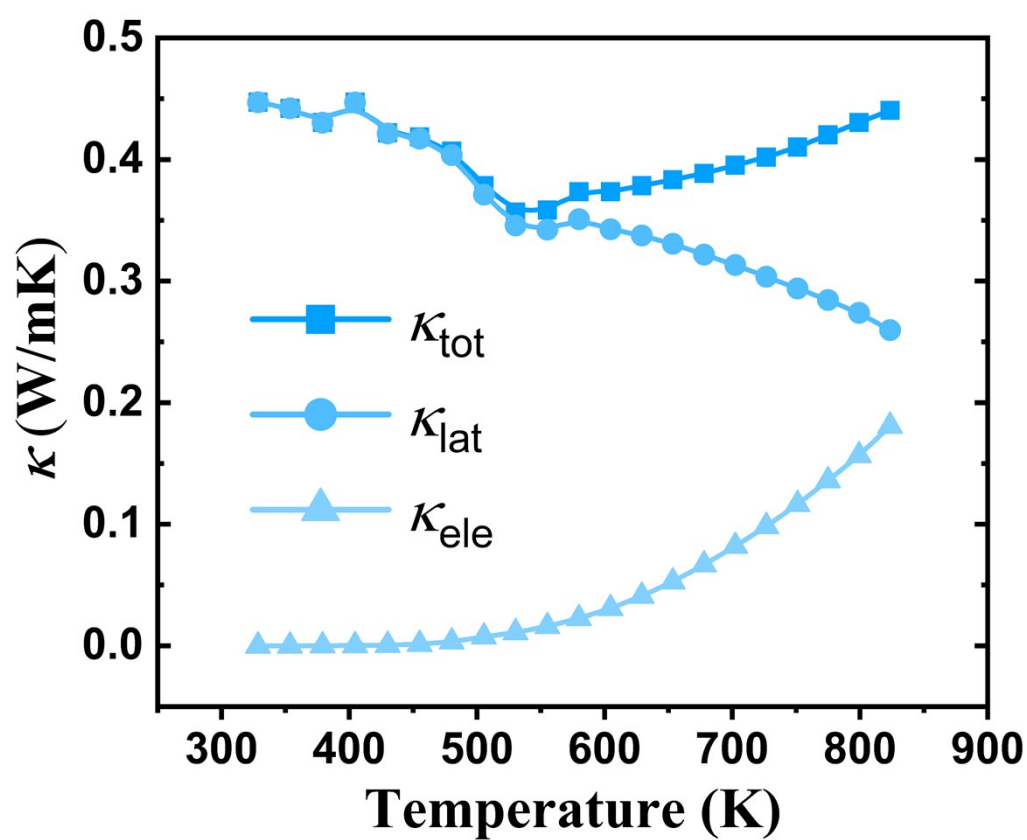

**Fig. S7** Temperature-dependent total thermal conductivity, lattice thermal conductivity and electronic thermal conductivity of BiAgSe<sub>0.8</sub>S<sub>1.2</sub>.

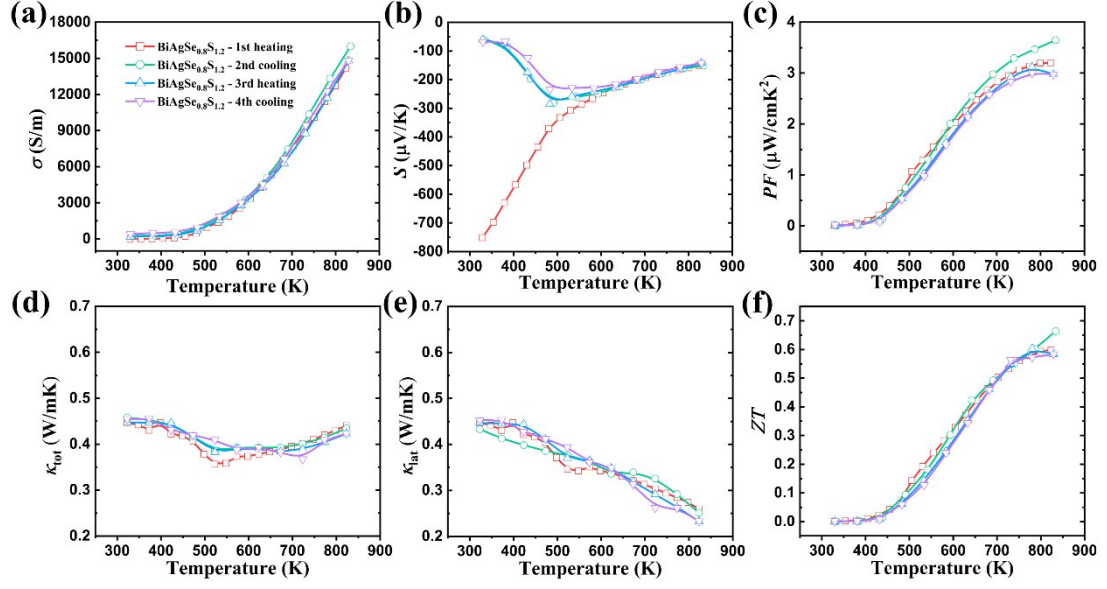

**Fig. S8** Repeatedly measured temperature-dependence of (a) electrical conductivity, (b) Seebeck coefficient, (c) power factor, (d) total thermal conductivity, (e) lattice thermal conductivity and (f)  $ZT$  for cubic  $\text{BiAgSe}_{0.8}\text{S}_{1.2}$ .
